# Supplementary material for: Electrochemical sensor for neurotransmitters at physiological pH using a heterocyclic conducting polymer modified electrode
Source: Royal Society of Chemistry journal article supplement (doi:10.1039/c1an15746a), 2011-11-03
Supplement: c1an15746a.pdf [file c1an15746a.pdf]

**Electronic Supplementary Information**

**Electrochemical sensor for neurotransmitters at physiological pH  
using heterocyclic conducting polymer modified electrode**

**S. Brilliants Revin, S. Abrahm John\***

Department of Chemistry, Gandhigram Rural Institute

Gandhigram - 624 302, Dindigul, Tamilnadu, India

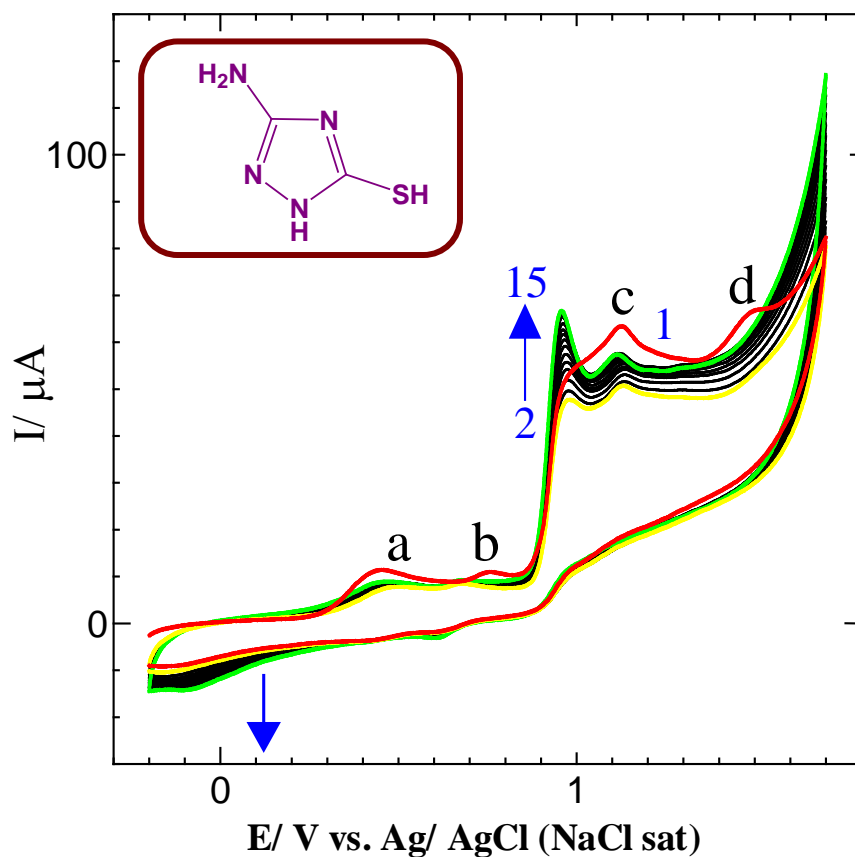

**Fig. ES1.** CV for electropolymerization of AMTa (15 cycles) on GC electrode in 1 mM AMTa containing 0.1 M  $\text{H}_2\text{SO}_4$  after 1<sup>st</sup>, 2<sup>nd</sup> and 15<sup>th</sup> cycles at a scan rate of  $50\text{ mV s}^{-1}$ .

*S. Brilliants Revin and S.A. John*

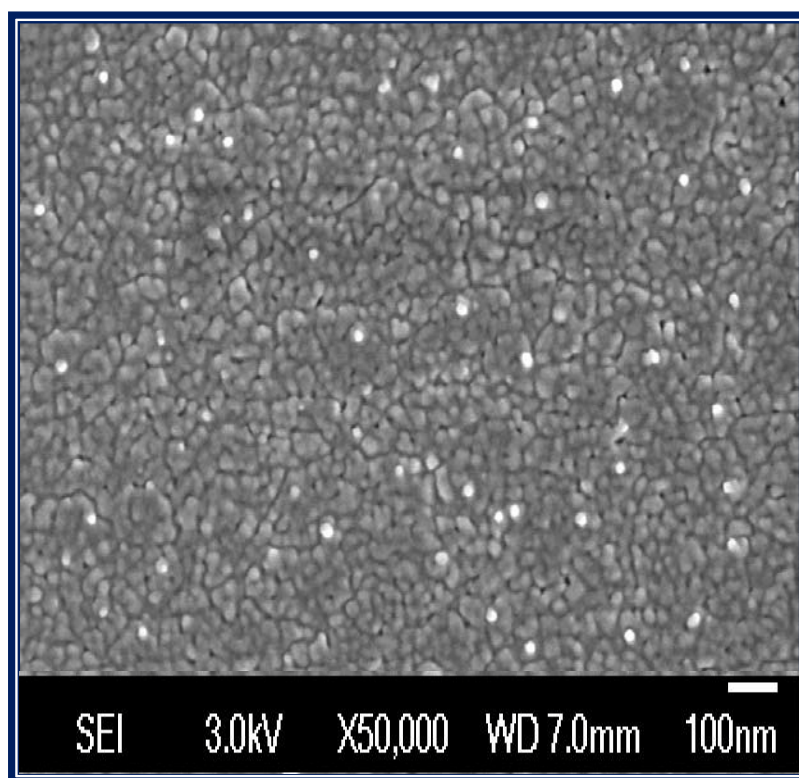

**Fig. ES2.** FE-SEM image of the p-AMTa film deposited on ITO electrode.

*S. Brillions Revin and S.A. John*

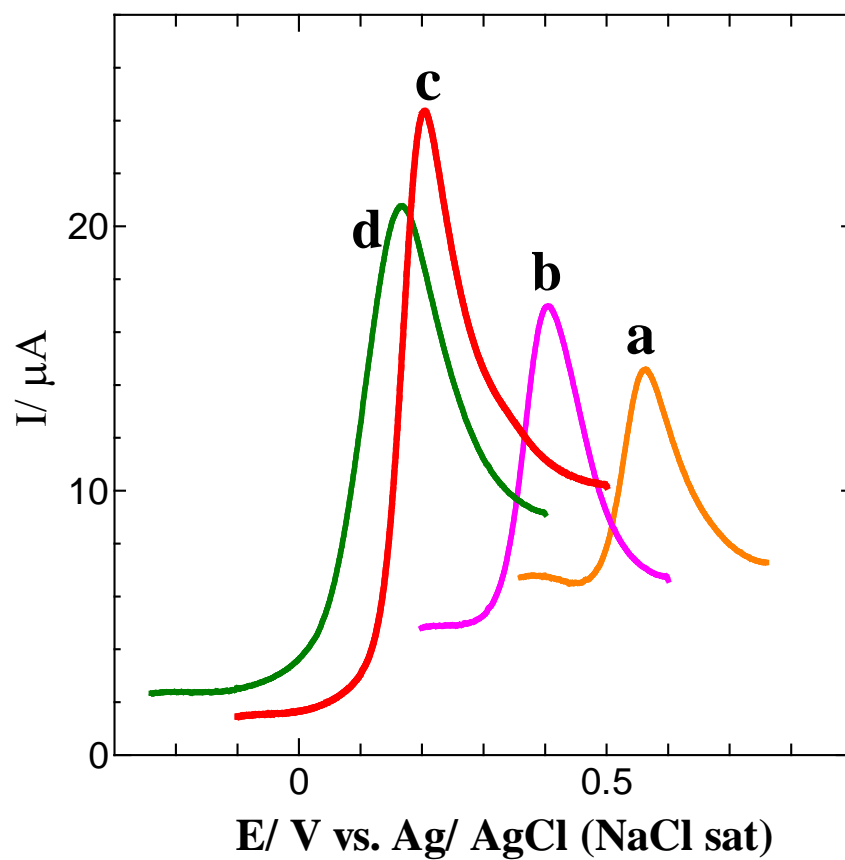

**Fig. ES3.** Linear sweep voltammograms obtained for the oxidation of NEP at different pH: (a) 1 (b) 4 (c) 7.2 (d) 9 at p-AMTa electrode in PB solution at a scan rate of  $50 \text{ mV s}^{-1}$ .

*S. Brilliants Revin and S.A. John*

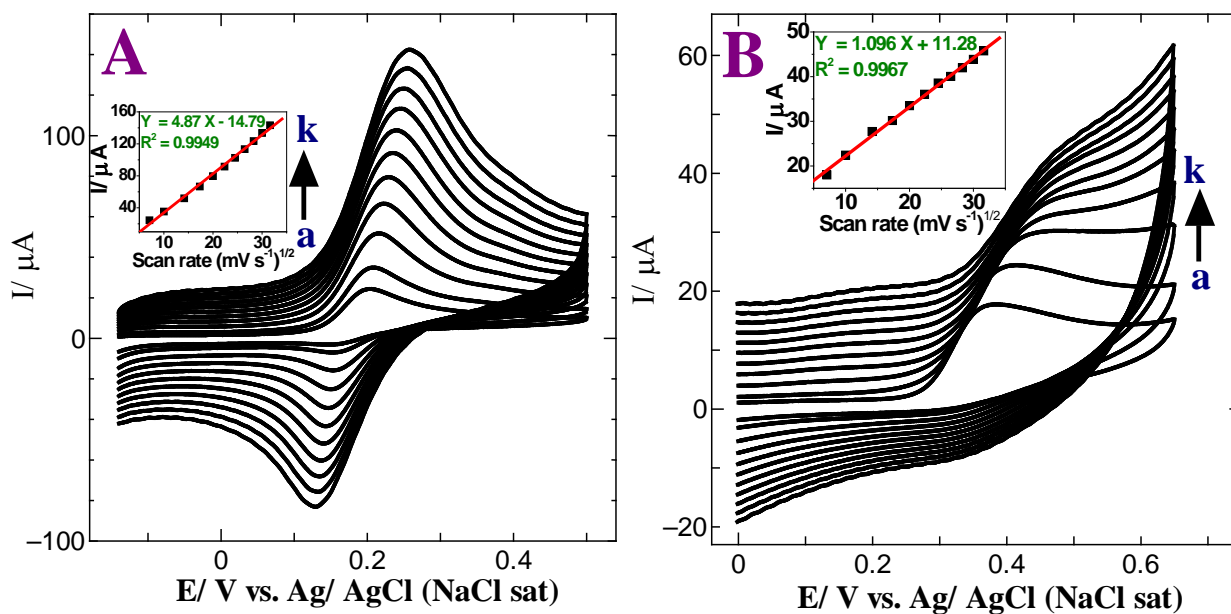

**Fig. ES4 (A)** CVs for 0.5 mM NEP at p-AMTa electrode in 0.2 M PB solution (pH 7.2) at different scan rates (a) 50 (b) 100 (c) 200 (d) 300 (e) 400 (f) 500 (g) 600 (h) 700 (i) 800 (j) 900 and (k) 1000  $\text{mV s}^{-1}$ . **Inset:** Plot of the anodic peak current vs. square root of scan rate. **(B)** CVs for 0.5 mM 5-HT at p-AMTa electrode in 0.2 M PB solution (pH 7.2) at different scan rates (a) 50 (b) 100 (c) 200 (d) 300 (e) 400 (f) 500 (g) 600 (h) 700 (i) 800 (j) 900 and (k) 1000  $\text{mV s}^{-1}$ . **Inset:** Plot of the anodic peak current vs. square root of scan rate.

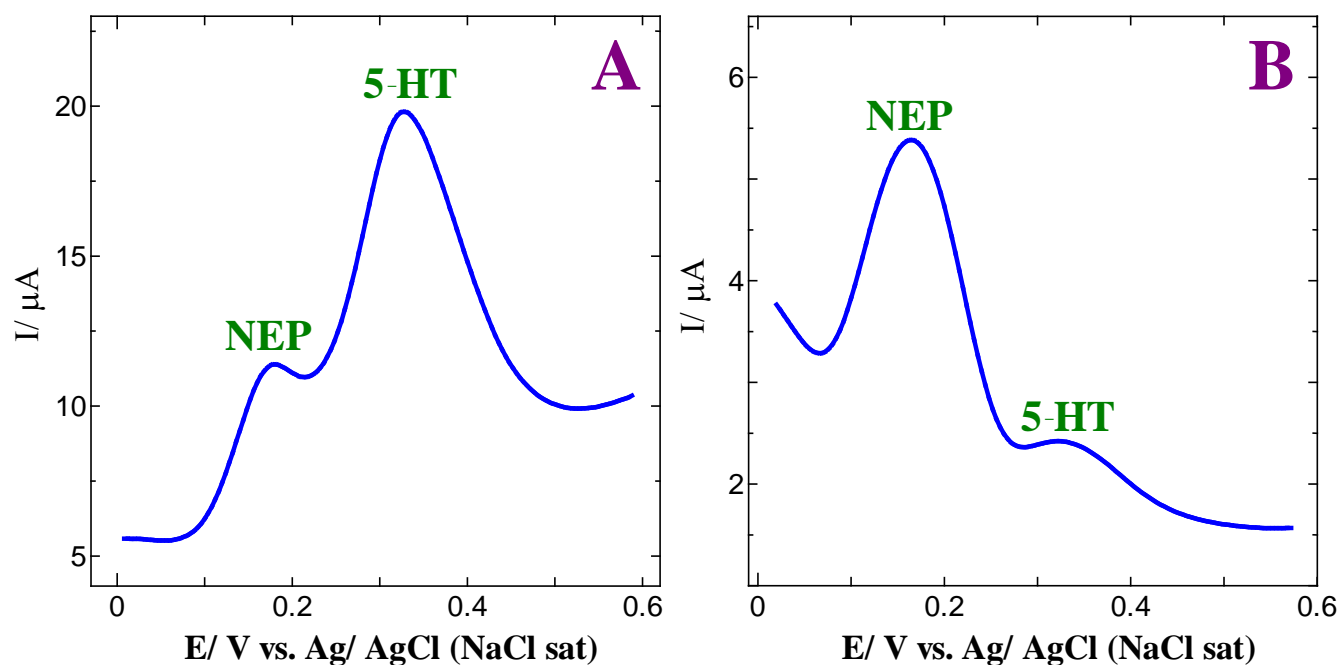

**Fig. ES5 (A)** DPV obtained for 15 μM NEP in the presence of 0.6 mM 5-HT at p-AMTa electrode in 0.2 M PB solution (pH 7.2). **(B)** DPV obtained for 5 μM 5-HT in the presence of 0.2 mM NEP at p-AMTa electrode in 0.2 M PB solution (pH 7.2). Pulse width = 0.06 s, amplitude = 0.05 V, sample period = 0.02 s and pulse period = 0.2 s.

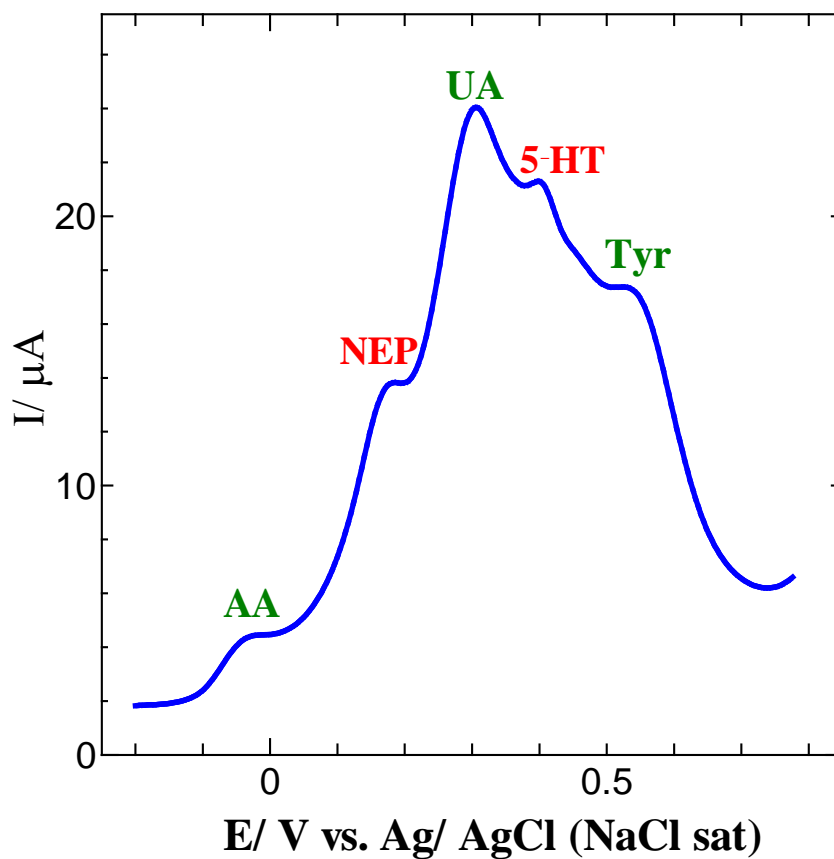

**Fig. ES6.** DPV obtained for 5  $\mu$ M each NEP and 5-HT in the presence of 0.5 mM each AA, UA and Tyr at p-AMTa electrode in 0.2 M PB solution (pH 7.2). Pulse width = 0.06 s, amplitude = 0.05 V, sample period = 0.02 s and pulse period = 0.2 s.

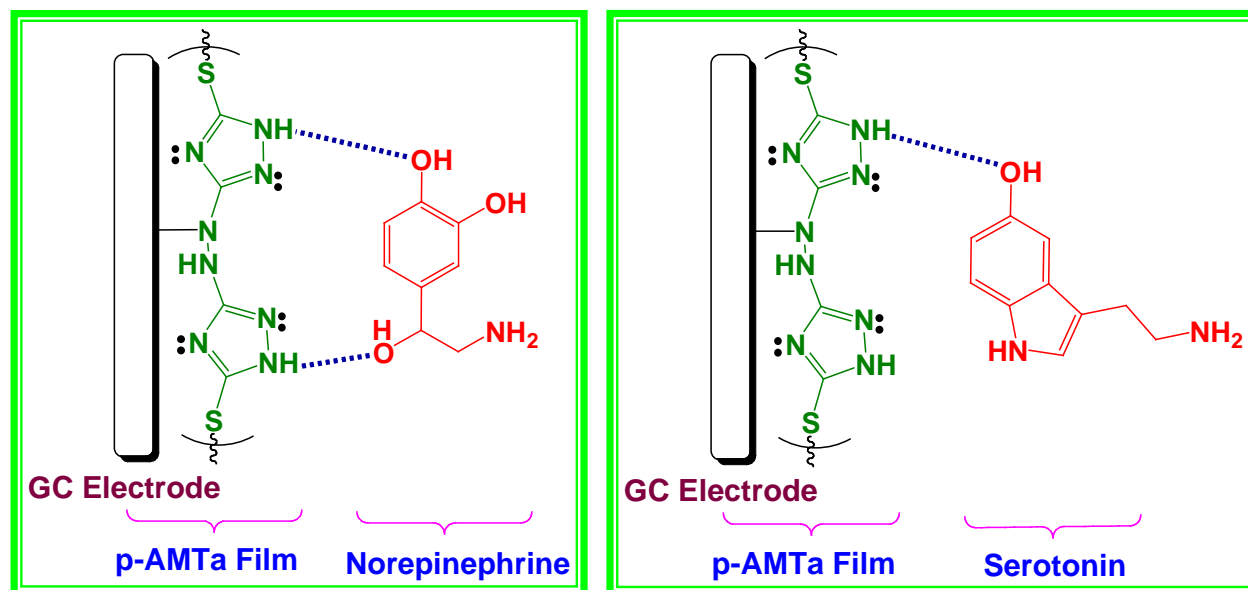

**Scheme ES1.** Schematic representation for the hydrogen bonding interactions between p-AMTa film and norepinephrine and serotonin.

*S. Brilliants Revin and S.A. John*
